## *Isoflurane Alters Angiotensin II–Induced $Ca^{2+}$ Mobilization in Aortic Smooth Muscle Cells from Hypertensive Rats*

### *Implication of Cytoskeleton*

Emmanuel Samain, M.D., Ph.D.,\* Hélène Bouillier, Ph.D.,† Catherine Rucker-Martin, Ph.D.,‡  
Jean-Xavier Mazoit, M.D., Ph.D.,§ Jean Marty, M.D.,|| Jean-François Renaud, Ph.D.,# Georges Dagher, Ph.D.\*\*

**Background:** Angiotensin II (AngII) is a potent vasoconstrictor involved in the short-term control of arterial blood pressure. Isoflurane was reported to decrease vascular tone through an alteration of vascular smooth muscle cell vasomotor response to several agonists, but its effect on AngII signaling is not known. On the other hand, vascular response to AngII is altered in hypertension. In this study, the authors tested the hypothesis that (1) isoflurane alters AngII-induced intracellular  $\text{Ca}^{2+}$  mobilization in aortic vascular smooth muscle cell from Wistar Kyoto and spontaneously hypertensive rats, and (2) this effect could be associated with an alteration of the organization of microtubular network, reported to be involved in AngII signaling.

**Methods:** The effect of 0.5–3% isoflurane was studied (1) on AngII ( $10^{-6}$  M)-induced intracellular  $\text{Ca}^{2+}$  mobilization, intracellular  $\text{Ca}^{2+}$  release from internal stores, and  $\text{Ca}^{2+}$  influx in Fura-2 loaded cultured aortic vascular smooth muscle cell isolated from 6-week-old Wistar Kyoto and spontaneously hypertensive rats, using fluorescent imaging microscopy; and (2) on the organization of cytoskeletal elements, using immunofluorescence labeling.

**Results:** In both strains, isoflurane decreased in a concentration-dependent manner AngII-induced intracellular  $\text{Ca}^{2+}$  mobilization,  $\text{Ca}^{2+}$  release from internal stores, and  $\text{Ca}^{2+}$  influx through nifedipine-insensitive  $\text{Ca}^{2+}$  channels. This effect occurred at a lower concentrations of isoflurane in Wistar Kyoto rats than in spontaneously hypertensive rats. In both strains, the effect of isoflurane on AngII- $\text{Ca}^{2+}$  mobilization was abolished by impairment with nocodazole, vinblastine, or paclitaxel of microtubules polymerization. Isoflurane directly altered tubular network organization in a concentration-dependent and reversible manner.

**Conclusions:** Isoflurane decreased AngII-induced  $\text{Ca}^{2+}$  mobilization at clinically relevant concentrations, suggesting that

vascular response to AngII could be altered during isoflurane anesthesia. The hypertensive strain was found less sensitive than the normotensive one. In both strains, the isoflurane effect was associated with a microtubular network interaction.

THE decrease in vascular tone observed during isoflurane anesthesia has been related in part to an alteration of the vascular smooth muscle cells' (VSMC) vasomotor response to vasoactive substances, including norepinephrine, endothelin, or vasopressin.<sup>1-3</sup> Angiotensin II (AngII) is a potent vasoconstrictor involved in the short-term control of arterial blood pressure during isoflurane anesthesia.<sup>4</sup> The hemodynamic effects of AngII are mediated through binding to angiotensin subtype 1 (AT<sub>1</sub>) receptors, which belong to the G protein-coupled receptor family. Activation of AT<sub>1</sub> receptor stimulates phospholipase C to hydrolyze phosphatidylinositol 4,5-bisphosphate, thereby producing inositol 1,4,5-trisphosphate. The latter then binds to its specific receptor located on Ca<sup>2+</sup> stores to release Ca<sup>2+</sup> from internal stores, and to activate Ca<sup>2+</sup> influx from extracellular spaces.<sup>5-7</sup> A normal response of VSMC to AngII may be critical for hemodynamic stability in several conditions encountered during the perioperative period, especially hypovolemia. However, the effect of isoflurane on AngII response is not described.

The present study was undertaken to assess the effect of isoflurane on AngII-induced intracellular  $\text{Ca}^{2+}$  mobilization and to gain further insight into the cellular mechanisms by which isoflurane could modulate AngII signaling. One mechanism that has been associated with intracellular  $\text{Ca}^{2+}$  mobilization is cytoskeletal function. We were particularly interested in the effect of isoflurane on microtubular and actin networks because several volatile anesthetic agents have been reported to directly interact with the organization of cytoskeletal elements,<sup>8,9</sup> and both actin and microtubular networks were recently reported to be involved in the transduction of several extracellular signals, including G protein-coupled transduction pathways and  $\text{Ca}^{2+}$  mobilization from internal store, or cell contraction in response to various agonists.<sup>10-16</sup>

On the other hand, structural and functional abnormalities of the arterial wall have been reported in some experimental models of genetic hypertension and have been associated with an increase in intracellular  $\text{Ca}^{2+}$  mobilization in VSMC in response to several agonists, especially AngII.<sup>17-23</sup> These abnormalities could partly

\* Professor, Department of Anesthesiology, Centre National de Recherche Scientifique ESA 8078, Marie Lannelongue Hospital, University of Paris 11, and Department of Anesthesiology, Beaujon Hospital, Assistance Publique-Hôpitaux de Paris, UFR Xavier Bichat, University of Paris 7, Clichy, France. † Postdoctoral Research Fellow, ‡ Senior Scientist, § Head of Research Laboratory, Centre National de Recherche Scientifique ESA 8078, Marie Lannelongue Hospital, University of Paris 11. ¶ Staff Anesthesiologist, Laboratory of Anesthesiology, UFR Kremlin-Bicêtre, University of Paris 11, Le Kremlin Bicêtre Cedex, France. || Professor and Head, Department of Anesthesiology, Beaujon Hospital, Assistance Publique-Hôpitaux de Paris, UFR Xavier Bichat, University of Paris 7, Clichy, France. \*\* Institut National Scientifique et de Recherche Médicale, Unité 465, University of Paris 6, Paris, France.

Received from the Centre National de Recherche Scientifique ESA 8078, Hôpital Marie Lannelongue, University Paris 11, Le Plessis Robinson, France. Submitted for publication July 31, 2001. Accepted for publication February 26, 2002. Supported by a grant from the Société Française d'Anesthésie et de Réanimation, Paris, France. Presented in part at the annual meetings of the Société Française d'Anesthésie et de Réanimation, Paris, France, September 22, 2000, and the American Society of Anesthesiologists, New Orleans, Louisiana, October 16, 2001.

Address correspondence to Dr. Samain: Centre National de Recherche Scientifique ESA 8078, Marie Lannelongue Hospital, University of Paris 11, 133 avenue de la Résistance, 92350 Le Plessis Robinson, France. Address electronic mail to: emmanuel.samain@bjn.ap-hop-paris.fr. Reprints will not be available from the authors. Individual article reprints may be purchased through the Journal Web site, [www.anesthesiology.org](http://www.anesthesiology.org).

explain the lability of blood pressure observed during general anesthesia in individuals who have essential hypertension.<sup>24,25</sup> For this purpose we compared the effects of isoflurane in VSMC from spontaneously hypertensive rats (SHR) to normotensive control (Wistar Kyoto rats [WKY]).

## Material and Methods

### Cell Culture

The study was approved by the Institutional Animal Investigation Committee and was conducted following recommendations established by the European Community Guidelines for Animal Ethical Care and Use of Laboratory Animals (Directive 86/609). Young male WKY/Nico rats (mean arterial pressure  $\pm$  SEM =  $98 \pm 4$  mmHg;  $n = 30$ ) and SHR/Nico (mean arterial pressure  $\pm$  SEM =  $136 \pm 5$  mmHg;  $n = 25$ ) aged 6 weeks were obtained from Iffa-Credo (L'Arbresle, France) and were used throughout the study. Cultured VSMC were obtained by enzymatic digestion as previously described.<sup>16,26</sup> In brief, aortas were incubated for 10 min in Dulbecco's modified Eagle medium (Eurobio, Les Ulis, France) supplemented with glutamine (2 mM), 0.1% bovine serum albumin, penicillin (10 U/ml), streptomycin (100 mg/ml), and collagenase (295 U/ml). After mechanical removal of adventitial and endothelial cell layers, the media was incubated in dissecting solution (20 min, 37°C) to which elastase (90 U/ml) and pronase (0.33 mg/ml) had been added. Cells were then detached by gentle pipetting of the tissue through a large hole Pasteur pipette. The procedure was then repeated twice on undigested tissue.

Isolated cells were seeded at  $1.5\text{--}2.0 \times 10^5$  cells/ml into 25-cm<sup>2</sup> flasks in Dulbecco's modified Eagle medium supplemented with 10% fetal calf serum (Eurobio), 2 mM L-glutamine, 25 mM HEPES, pH 7.4, 10 U/ml penicillin, and 100 mg/ml streptomycin, and incubated at 37°C and 5% CO<sub>2</sub> in a humidified incubator. At confluence, secondary cultures were obtained by serial passage after the cells were harvested with 0.5 g/l trypsin and 0.2 g/l EDTA (Sigma-Aldrich, Saint Quentin Falavier, France) and reseeded in fresh Dulbecco's modified Eagle medium containing 10% fetal calf serum. Cells between the third and ninth passage were studied at confluence and were made quiescent by incubation for 48 h in a fetal calf serum-free media (0.5%) before the experiment. At least 10 sets of cells were analyzed at each passage.

### Cell Ca<sup>2+</sup> Measurements

Intracellular Ca<sup>2+</sup> variations were assessed in single cells using fluorescence imaging as described previously.<sup>16</sup> In brief, cells were loaded with the acetoxymethyl ester form of Fura-2 (5  $\mu$ M, 30 min at 37°C; Molecular Probe, AA Leiden, The Netherlands). The coverslips were mounted on the stage of a Nikon Diaphot micro-

scope (Nikon, Kawasaki, Japan) fitted with a cooled integrating Coupled Charged Device imaging system (Newcastle Photometric System, Newcastle upon Tyne, United Kingdom), and cells were superfused with Na<sup>+</sup>-HEPES solution at 37°C at a flow rate of 1 ml/min. An area on the coverslip chamber containing 10–15 cells was randomly selected with the microscope, and the position of the objective was focused to view the median section of the cells. Cells were illuminated alternately at 350 and 380 nm, and the intensity of emitted light from single cells during a 500-ms period at wavelength greater than 520 nm was measured. The ratio of the light intensities at the two wavelengths, plotted against time, was used to reflect qualitative changes in intracellular Ca<sup>2+</sup>.<sup>27</sup> Because calibration procedures are prone to error, no attempt was made to calibrate the ratio values.<sup>5,28,29</sup>

### Staining of Filamentous Actin and $\alpha$ -Tubulin

To assess the effect of isoflurane on the organization of the cytoskeleton, the actin and microtubular networks were visualized using double indirect immunofluorescence labeling. After two washes in phosphate-buffered saline (Life Technologies, Cergy-Pontoise, France), VSMC were fixed in 4% formaldehyde for 10 min and then permeabilized 10 min with 0.2% Triton X-100 (Sigma-Aldrich, Saint Quentin Falavier, France) at room temperature. Cultures were incubated in phosphate-buffered saline containing 5% bovine serum albumin for 60 min to block nonspecific binding sites. This was followed by overnight incubation at 4°C in a humidified chamber in the presence of monoclonal antibodies directed against  $\alpha$ -tubulin (1/200; Sigma-Aldrich) in phosphate-buffered saline containing 2% bovine serum albumin. After washing, horse biotinylated antimouse immunoglobulin G (1/30; Vector Laboratories, Abcys, Paris, France) was added for 60 min at room temperature. Cells were washed again and incubated for 60 min with Streptavidin-Texas red (1/30; Amersham, Bioscience, Orsay, France). This was followed after washes by an incubation with fluorescein isothiocyanate conjugated-phalloidin (1/20; Sigma-Aldrich) for 90 min. After a final wash, coverslips were placed in mounting medium (Fluoprep; Merieux, Lyon, France). Slides were examined with a Leica DMLB fluorescence microscope set for fluorescein and Texas red fluorescence and connected to a Sony 3 CCD DXC 930P color camera (Sony Corp., Tokyo, Japan). The resulting images were printed on an Epson Stylus Photo 890 printer (Seiko Epson Corp., Nagano, Japan). In control experiments, the incubation steps with primary antibodies were omitted. Experiments were performed in triplicate.

### Disorganization of Actin or Tubular Networks

A common approach to assess the implication of cytoskeletal elements in cellular response is to hamper the organization of a network using specific agents. Prelim-

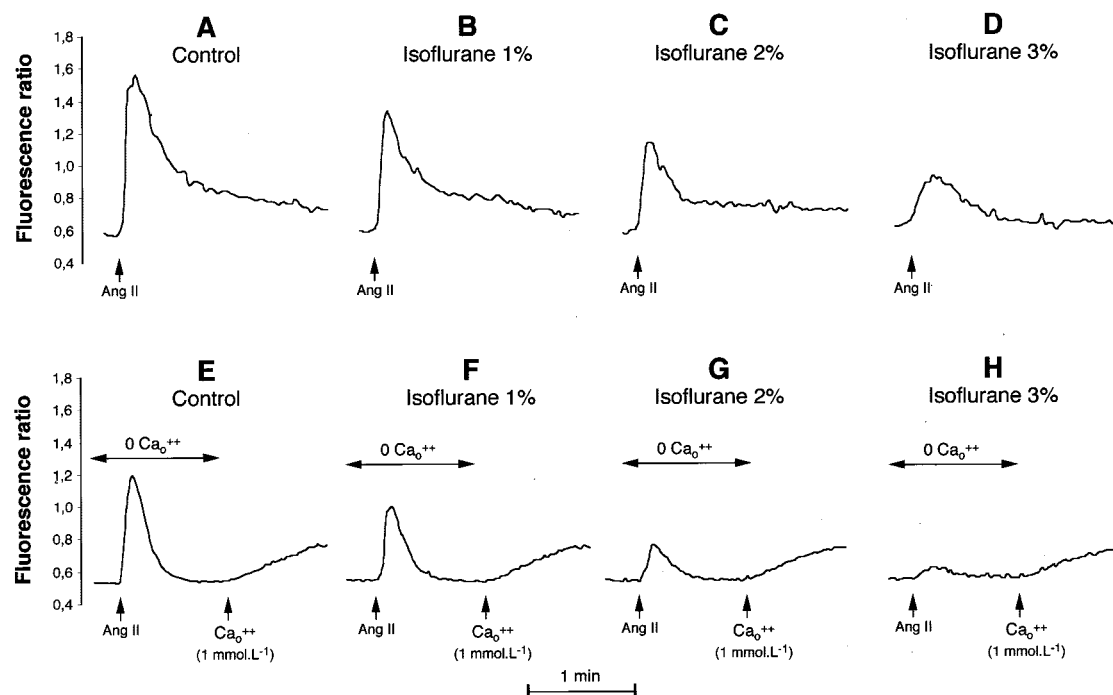

**Fig. 1.** Representative recordings of the effect of 1  $\mu\text{M}$  angiotensin II (AngII) on intracellular  $\text{Ca}^{2+}$  increase in a control cell from WKY and in cells incubated in the presence of 1, 2, or 3% isoflurane. In protocols A–D, cells were exposed to AngII in the presence of external  $\text{Ca}^{2+}$  ( $\text{Ca}_o^{2+}$ ). In protocols E–H, cells were incubated for 60 s in the nominal absence of external  $\text{Ca}^{2+}$  and then exposed to AngII. External  $\text{Ca}^{2+}$  was reintroduced in the perfusion medium and AngII-induced  $\text{Ca}^{2+}$  influx was estimated by the time course of  $\text{Ca}^{2+}$  increase. In recordings B–D and F–H, cells were incubated in  $\text{Na}^+$ -HEPES medium containing 1, 2, and 3% isoflurane, respectively (15 min). Ratios of the emission fluorescence ( $> 520 \text{ nm}$ ) measured at excitation wavelengths of 350 and 380 nm are shown on the ordinate.

inary experiments were conducted to determine the optimal concentration and time of incubation for each agent to impair network organization without inducing cell shape modification. Cells were incubated 30 min at  $37^\circ\text{C}$  in the presence of 5  $\mu\text{M}$  nocodazole, 10  $\mu\text{M}$  vinblastine, 8  $\mu\text{M}$  paclitaxel or 2  $\mu\text{M}$  cytochalasin D and then either stimulated by AngII to assess intracellular  $\text{Ca}^{2+}$  mobilization or fixed for tubulin and actin immunostaining.

#### Experimental Procedure

Cells were exposed to AngII, which induced a rapid increase in intracellular  $\text{Ca}^{2+}$  (figs. 1A–D) followed by a return toward initial values.  $\text{Ca}^{2+}$  transient was characterized by its amplitude (peak minus basal ratio) and slope of intracellular  $\text{Ca}^{2+}$  increase. The optimal concentration of AngII that induced a maximal mobilization of  $\text{Ca}^{2+}$  in both stains was determined by increasing concentration (0.1 nM to 10.0  $\mu\text{M}$ ) in both WKY and SHR strains.<sup>16</sup> In accordance with previous studies, this was observed for concentrations greater than 0.5  $\mu\text{M}$ .<sup>19</sup> Subsequently, the effect of AngII was assessed at 1  $\mu\text{M}$  in both strains.  $\text{AT}_1$  antagonists CGP-48 933 (100 nM) and CI-996 (100 nM) inhibited the response to AngII in both strains ( $> 95\%$  inhibition,  $P < 0.0001$  for each, results not shown). AngII-induced intracellular  $\text{Ca}^{2+}$  mobilization was not significantly different in cells from the third to the ninth passage in both strains ( $F = 0.26$ , analysis of variance;  $P =$

not significant [NS]). As previously described, AngII induced a receptor desensitization that precluded repetitive stimulation of the same cell by AngII.<sup>30</sup>

AngII-induced  $\text{Ca}^{2+}$  mobilization from internal stores was assessed in the absence of external  $\text{Ca}^{2+}$  (figs. 1E–H).  $\text{Ca}^{2+}$  transient was characterized by its amplitude (peak minus basal ratio), slope of intracellular  $\text{Ca}^{2+}$  increase, and total  $\text{Ca}^{2+}$  released, estimated by area under transient. As previously described,  $\text{Ca}^{2+}$  mobilization was higher in the SHR than in WKY (table 1).<sup>16,19</sup>

AngII-induced  $\text{Ca}^{2+}$  influx was estimated after exposure of cells to AngII in the absence of external  $\text{Ca}^{2+}$ , from the rate of intracellular  $\text{Ca}^{2+}$  increase following reintroduction of external  $\text{Ca}^{2+}$  (fig. 1E). In preliminary experiments, intracellular  $\text{Ca}^{2+}$  changes occurring in nonstimulated cells as a consequence of  $\text{Ca}^{2+}$  chelation and reintroduction were found to be very low, with a mean of 0.002 ratio unit/min.  $\text{Ca}^{2+}$  influx elicited by AngII was not significantly altered by nifedipine (5  $\mu\text{M}$ ) in either strain (WKY:  $98 \pm 8\%$  of control values,  $n = 73$ ; SHR:  $93 \pm 14\%$  of control values,  $n = 43$ ;  $P = \text{NS}$  for each). To assess the role of the  $\text{Na}^+$ - $\text{Ca}^{2+}$  exchanger in AngII-induced  $\text{Ca}^{2+}$  influx, experiments were performed in the absence of external  $\text{Na}^+$ , which had been replaced by *N*-methyl-glucamine (NMG; Sigma-Aldrich).  $\text{Ca}^{2+}$  influx was similar in  $\text{Na}^+$ -HEPES and NMG-HEPES solution in both WKY ( $\text{Na}^+$ -HEPES:  $0.396 \pm 0.024$  ratio



**Table 1. Characteristics of Ca<sup>2+</sup> Mobilization Induced by Angiotensin II**

|                                                                                        | WKY (n = 34) | SHR (n = 40) | P Value  |
|----------------------------------------------------------------------------------------|--------------|--------------|----------|
| Angiotensin II-induced Ca <sub>i</sub> <sup>2+</sup> mobilization from internal stores |              |              |          |
| Amplitude (ratio unit)                                                                 | 0.50 ± 0.03  | 0.76 ± 0.05  | < 0.0001 |
| Slope of Ca <sub>i</sub> <sup>2+</sup> increase (ratio unit/min)                       | 6.8 ± 0.7    | 7.8 ± 0.7    | 0.37     |
| Total Ca <sub>i</sub> <sup>2+</sup> (ratio unit/s)                                     | 9.3 ± 0.6    | 12.9 ± 1.1   | < 0.0001 |
| Angiotensin II-induced Ca <sup>2+</sup> influx (ratio unit/min)                        | 0.51 ± 0.05  | 0.51 ± 0.02  | 0.21     |

Angiotensin II (1 μM)-induced Ca<sup>2+</sup> mobilization from internal stores measured in the nominal absence of external Ca<sup>2+</sup> (Ca<sup>2+</sup>-free medium), and Ca<sup>2+</sup> influx measured upon reintroduction of external Ca<sup>2+</sup> (1 mM). Data are presented as mean ± standard error of the mean. P value for comparison of spontaneously hypertensive rats (SHR) versus Wistar-Kyoto (WKY) rats. n = number of cells analyzed; Ca<sub>i</sub><sup>2+</sup> = intracellular Ca<sup>2+</sup>.

unit/min; NMG-HEPES: 0.402 ± 0.042; n = 109; P = NS) and SHR (Na<sup>+</sup>-HEPES: 0.481 ± 0.048 ratio unit/min; NMG-HEPES: 0.410 ± 0.040; n = 103; P = NS). This suggests that the participation of the Na<sup>+</sup>-Ca<sup>2+</sup> exchanger in Ca<sup>2+</sup> influx is negligible in our conditions.

#### Anesthetic Agent

Output from an isoflurane calibrated vaporizer (Fortec 3; Cyprane LTD, Keighley, United Kingdom) was bubbled through 100-ml glass bottles containing either Na<sup>+</sup>-HEPES or Ca<sup>2+</sup>-free Na<sup>+</sup>-HEPES solution and allowed to equilibrate for 60 min at 37°C. Air at a flow rate of 1 l/min was used as a carrier gas. Isoflurane (obtained from Abbott Laboratories, Cergy, France) was studied at concentration of 0.5, 1, 2, or 3 vol% in air. No correction was performed to adjust for interspecies variation of anesthetic potency because end-tidal isoflurane requirement to achieve a 1.0 minimal alveolar concentration level of anesthesia has been reported to be very similar in WKY (mean ± SD: 1.20 ± 0.05%) and SHR (mean ± SD: 1.26 ± 0.07; difference NS).<sup>31</sup> Teflon tubing was used to reduce anesthetic agent loss between the bottle and the recording chamber. Aqueous phase concentrations of isoflurane in the solution, sampled at the recording chamber level, were determined by direct spectrometry at three wavelengths (210, 280, and 600 nm) using a variable wavelength spectrometer (model 1050; Hewlett Packard, Les Ulis, France).<sup>32</sup> Isoflurane concentrations measured after 60-min equilibration with the superfusion solution were 0.27 ± 0.05, 0.51 ± 0.08, and 0.68 ± 0.13 mM (mean ± SEM) at 1, 2, and 3%, respectively. To ensure stable isoflurane concentration in the solution at the recording chamber level, the chamber itself was covered by a semiclosed Plexiglass reservoir, continuously aerated by a derivation from the output of the vaporizer. Isoflurane concentration in the gas phase of this reservoir was continuously monitored by an infrared calibrated analyzer (Capnomac; Datex Instrumentarium, Helsinki, Finland).

#### Fluids and Drugs

The composition of the Na<sup>+</sup>-HEPES solution was 140 mM NaCl, 4.5 mM KCl, 0.8 mM MgCl<sub>2</sub>, 0.8 mM KH<sub>2</sub>PO<sub>4</sub>, 1.0 mM CaCl<sub>2</sub>, 5.6 mM glucose, and 10 mM HEPES. Ca<sup>2+</sup>-free Na<sup>+</sup>-HEPES solution was made with-

out CaCl<sub>2</sub> and with the addition of 1 mM EGTA. NMG-HEPES solution was made by replacing the NaCl with NMG. Penicillin and streptomycin were obtained from Life Technology (Cergy-Pontoise, France). AngII, thapsigargin, cytochalasin D, nocodazole, vinblastine, and paclitaxel (all obtained from Sigma-Aldrich), CI-996 (obtained from Parke-Davis Pharmaceutical Research, Ann Arbor, MI), CGP-48933 (obtained from Ciba-Geigy, Basle, Switzerland), and nifedipine (obtained from Bayer, Puteaux, France) were dissolved in Na<sup>+</sup>-HEPES solution before use.

#### Statistical Analysis

Results are presented as mean ± SEM. The values of parameters of Ca<sup>2+</sup> mobilization measured in treated cells are expressed as percentage of the control values (untreated cells). Student *t* test for unpaired data were used to compare mean values obtained in control cells with values obtained in treated cells and to compare mean values obtained in WKY with those in SHR. A comparison of the values obtained in cells from passages 3–9 for each strain was performed by analysis of variance with multiple testing according to the Bonferroni method. Statistical analysis were performed using Statview 5.1 software (SAS Institute Inc., Cary, NC). P < 0.05 was considered significant.

## Results

#### Effect of Isoflurane on Cell Ca<sup>2+</sup> Handling

Resting cell Ca<sup>2+</sup> concentration was not significantly altered by exposure of VSMC to 3% isoflurane for 10 min (WKY: 100 ± 6% of control value, n = 29, P = NS; SHR: 103 ± 6%, n = 30, P = NS) or for 15 min (WKY: 99 ± 6% of control value, n = 25, P = NS; SHR: 105 ± 6%, n = 28, P = NS).

To assess the effect of isoflurane on total intracellular Ca<sup>2+</sup> mobilization, cells loaded with Fura-2 were incubated in the presence of 0.5–3% isoflurane for 15 min and then exposed to AngII in the presence of external Ca<sup>2+</sup>. In both strains, isoflurane induced a concentration-dependent decrease in intracellular Ca<sup>2+</sup> release elicited by AngII in the presence of external Ca<sup>2+</sup> (WKY: figs. 1A–D and table 2; SHR: table 3). This effect was observed at concentration of isoflurane greater than 0.5% for WKY and 1% for SHR.

To assess the effect of isoflurane on AngII-induced intracellular Ca<sup>2+</sup> release from internal stores, cells were

**Table 2. Effects of Isoflurane on Angiotensin II–induced  $\text{Ca}^{2+}$  Mobilization in Wistar-Kyoto Rats**

|                                                      | Isoflurane (%) |         |         |         |
|------------------------------------------------------|----------------|---------|---------|---------|
|                                                      | 0.5            | 1       | 2       | 3       |
| Angiotensin II–induced $\text{Ca}^{2+}$ mobilization |                |         |         |         |
| In the presence of external $\text{Ca}^{2+}$         |                |         |         |         |
| Amplitude                                            | 89 ± 13        | 63 ± 3‡ | 54 ± 4‡ | 49 ± 5‡ |
| Slope                                                | 99 ± 13        | 79 ± 5* | 63 ± 6‡ | 39 ± 5‡ |
| n (cells/coverlips)                                  | 42/5           | 67/6    | 80/7    | 58/6    |
| In the absence of external $\text{Ca}^{2+}$          |                |         |         |         |
| Amplitude                                            | 97 ± 10        | 72 ± 6† | 40 ± 3‡ | 7 ± 4‡  |
| Slope                                                | 82 ± 11        | 75 ± 5* | 28 ± 4‡ | 4 ± 2‡  |
| Total $\text{Ca}^{2+}$                               | 94 ± 7         | 77 ± 9  | 35 ± 4‡ | 9 ± 4‡  |
| n (cells/coverlips)                                  | 65/5           | 40/6    | 41/6    | 26/5    |
| Angiotensin II–induced $\text{Ca}^{2+}$ influx       | 84 ± 12        | 78 ± 4† | 41 ± 4‡ | 35 ± 4‡ |
| Thapsigargin-induced $\text{Ca}^{2+}$ influx         | NM             | 67 ± 4‡ | 35 ± 3‡ | 29 ± 4‡ |
| n (cells/coverlips)                                  | —              | 62/6    | 45/6    | 66/6    |

Effect of isoflurane (0.5–3%) on angiotensin II (1  $\mu\text{M}$ )–induced intracellular  $\text{Ca}^{2+}$  mobilization in the presence ( $\text{Na}^+$ -HEPES medium) and nominal absence of external  $\text{Ca}^{2+}$  ( $\text{Ca}^{2+}$ -free medium) and on  $\text{Ca}^{2+}$  influx induced either by angiotensin II or thapsigargin in vascular smooth muscle cells from Wistar-Kyoto rats. Results are expressed as percent of control values obtained in nontreated cells.

\*  $P < 0.05$ , †  $P < 0.001$ , and ‡  $P < 0.0001$  for isoflurane-treated cells versus nontreated cells.

n = number of cells/number of coverslips analyzed; NM = not measured.

incubated in the presence of 0.5–3% isoflurane for 15 min and then exposed to AngII in  $\text{Ca}^{2+}$ -free medium.  $\text{Ca}^{2+}$  influx was assessed on reintroduction of external  $\text{Ca}^{2+}$ . In both strains, isoflurane decreased  $\text{Ca}^{2+}$  release from internal stores and  $\text{Ca}^{2+}$  influx in a concentration-dependent manner (WKY: figs. 1E–H and table 2; SHR: table 3).

To assess the effect of isoflurane on  $\text{Ca}^{2+}$  stores operated channels, a depletion of  $\text{Ca}^{2+}$  intracellular stores was induced by exposing cells to thapsigargin (3  $\mu\text{M}$ ), an inhibitor of the sarco/endoplasmic reticulum  $\text{Ca}^{2+}$  adenosine triphosphatase, in the absence of external  $\text{Ca}^{2+}$ . In both strains, this induced a transient intracellular  $\text{Ca}^{2+}$  increase at a slower rate than that observed with AngII.

Incubation of VSMC with thapsigargin for 5 min abolished the response to subsequent infusion of AngII in the two strains (results not shown), as previously reported.<sup>19</sup> Furthermore, thapsigargin completely depleted intracellular  $\text{Ca}^{2+}$  stores because ionomycin addition did not elicit any increase in cell  $\text{Ca}^{2+}$  (WKY:  $98 \pm 1\%$  of inhibition, n = 28; SHR:  $98 \pm 2\%$  of inhibition, n = 25;  $P < 0.001$  for each). Reintroduction of  $\text{Ca}^{2+}$  (1 mM) into the medium induced a  $\text{Ca}^{2+}$  influx of similar magnitude to that observed after stimulation with 1  $\mu\text{M}$  AngII. Isoflurane at concentration of 1–3% and 2–3% significantly decreased thapsigargin-induced  $\text{Ca}^{2+}$  influx in WKY (table 2) and SHR (table 3), respectively.

**Table 3. Effects of Isoflurane on Angiotensin II–induced  $\text{Ca}^{2+}$  Mobilization in Spontaneously Hypertensive Rats**

|                                                      | Isoflurane (%) |         |          |          |
|------------------------------------------------------|----------------|---------|----------|----------|
|                                                      | 0.5            | 1       | 2        | 3        |
| Angiotensin II–induced $\text{Ca}^{2+}$ mobilization |                |         |          |          |
| In the presence of external $\text{Ca}^{2+}$         |                |         |          |          |
| Amplitude                                            | 104 ± 8        | 94 ± 3# | 86 ± 4#  | 79 ± 5†# |
| Slope                                                | 103 ± 8        | 83 ± 8  | 63 ± 5‡  | 54 ± 6‡§ |
| n (cells/coverlips)                                  | 89/7           | 49/7    | 69/5     | 53/4     |
| In the absence of external $\text{Ca}^{2+}$          |                |         |          |          |
| Amplitude                                            | 102 ± 11       | 92 ± 5† | 61 ± 5‡  | 35 ± 3‡  |
| Slope                                                | 101 ± 13       | 84 ± 5  | 57 ± 4‡  | 57 ± 6‡§ |
| Total $\text{Ca}^{2+}$                               | 114 ± 12       | 89 ± 5  | 56 ± 5‡  | 30 ± 4‡§ |
| n (cells/coverlips)                                  | 32/5           | 32/4    | 51/6     | 35/6     |
| Angiotensin II–induced $\text{Ca}^{2+}$ influx       | 89 ± 15        | 92 ± 5  | 71 ± 5‡# | 30 ± 3‡  |
| Thapsigargin-induced $\text{Ca}^{2+}$ influx         | NM             | 85 ± 6  | 51 ± 3‡  | 44 ± 4‡  |
| n (cells/coverlips)                                  | —              | 62/6    | 67/6     | 66/6     |

Effect of isoflurane (0.5–3%) on angiotensin II (1  $\mu\text{M}$ )–induced intracellular  $\text{Ca}^{2+}$  mobilization in the presence ( $\text{Na}^+$ -HEPES medium) and nominal absence of external  $\text{Ca}^{2+}$  ( $\text{Ca}^{2+}$ -free medium) and on  $\text{Ca}^{2+}$  influx induced either by angiotensin II or thapsigargin in vascular smooth muscle cells from spontaneously hypertensive rats. Results are expressed as percent of control values obtained in nontreated cells.

\*  $P < 0.05$ , †  $P < 0.001$ , and ‡  $P < 0.0001$  for isoflurane-treated cells versus nontreated cells; §  $P < 0.05$ , ||  $P < 0.001$ , #  $P < 0.0001$  for spontaneously hypertensive versus Wistar-Kyoto rats.

n = number of cells/number of coverslips analyzed; NM = not measured.

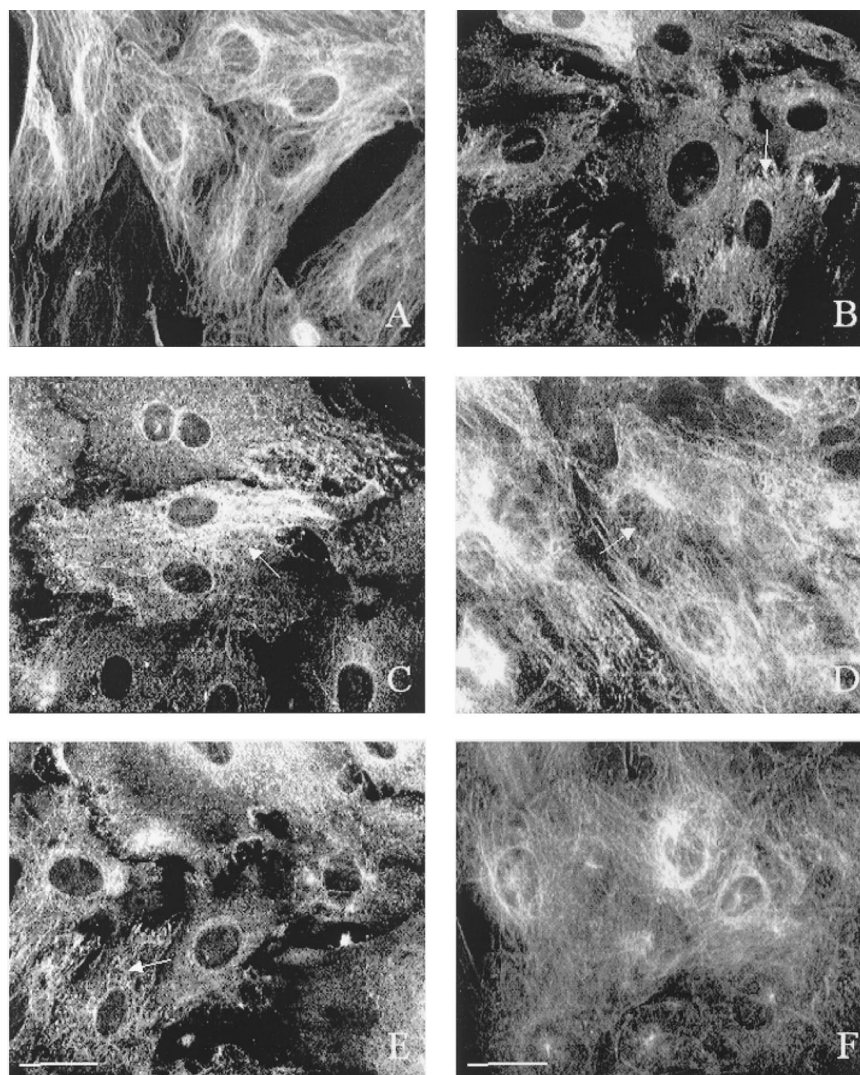

**Fig. 2.** Immunostaining of  $\alpha$ -tubulin network in cells from Wistar Kyoto rats (WKY). (A) Control cells; (B) pretreatment with nocodazole ( $5 \mu\text{M}$ , 30 min) showing the formation of  $\alpha$ -tubulin aggregates (arrow); (C–E) exposure to 1, 2, and 3% isoflurane, respectively (15 min), revealing the alteration of tubular organization (arrows); (F) exposure to 3% isoflurane (15 min), followed by 60 min of wash out, showing the reversibility of isoflurane effect. Bar =  $100 \mu\text{m}$ .

#### *Reversibility of Isoflurane Action*

To assess the reversibility of the effect of isoflurane, cells were exposed to 3% isoflurane for 15 min and washed out with isoflurane-free  $\text{Na}^+$ -HEPES solution for another 60-min period. In both strains, the effect of isoflurane on AngII-induced  $\text{Ca}^{2+}$  mobilization (results not shown) was completely reversible 60 min after anesthetic retrieval.

#### *Interaction between Cytoskeleton Elements and Isoflurane*

Cytoskeletal elements have been shown recently to be involved in the  $\text{Ca}^{2+}$  mobilization induced by AngII.<sup>16</sup> We tested the hypothesis that the inhibitory effect of isoflurane could be linked to an interaction between isoflurane and actin or tubulin networks.

#### *Effect of Disorganizing Cytoskeleton Elements on Isoflurane Action*

We first studied the effect of an alteration of cytoskeleton dynamic on the inhibition AngII-induced  $\text{Ca}^{2+}$  mobilization by isoflurane.

To assess the implication of  $\alpha$ -tubulin network, cells were incubated in the presence of nocodazole ( $5 \mu\text{M}$ , 30 min at  $37^\circ\text{C}$ ) and exposed to 2% isoflurane. At this concentration, nocodazole disorganized microtubular network without altering cell shape (WKY: fig. 2, SHR: fig. 3), and, as expected, no differential effect could be observed on actin network with this agent (result not shown). As previously described,<sup>16</sup> pretreatment with nocodazole significantly reduced AngII-induced  $\text{Ca}^{2+}$  mobilization from internal stores (fig. 4), whereas  $\text{Ca}^{2+}$  influx was not significantly altered in both strains. In both WKY and SHR, 2% isoflurane had no significant effect on  $\text{Ca}^{2+}$  mobilization in cells pretreated with nocodazole (fig. 4). Similar results on  $\text{Ca}^{2+}$  release from internal stores were obtained with vinblastine or paclitaxel, which alter organization of microtubules by different mechanisms, in both WKY and SHR (fig. 4).

The role of actin network was assessed using pretreatment with cytochalasin D at a concentration of  $2 \mu\text{M}$  for 30 min, known to disrupt actin network, with the for-



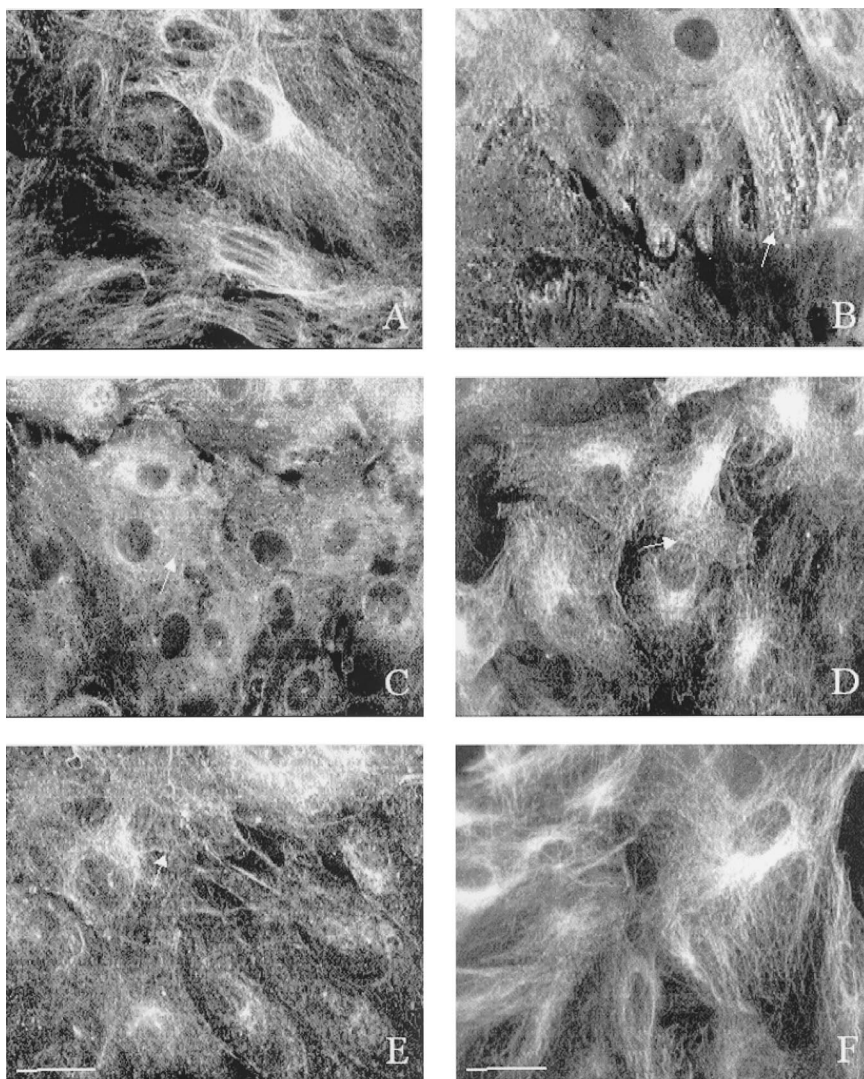

**Fig. 3.** Immunostaining of  $\alpha$ -tubulin network in cells from spontaneously hypertensive rats (SHR). (A) Control cells; (B) pretreatment with nocodazole ( $5 \mu\text{M}$ , 30 min) showing the formation of  $\alpha$ -tubulin aggregates (arrow); (C–E) exposure to 1, 2, and 3% isoflurane, respectively (15 min), revealing the alteration of tubular organization (arrows); (F) exposure to 3% isoflurane (15 min), followed by 60 min of wash out, showing the reversibility of isoflurane effect. Bar =  $100 \mu\text{m}$ .

mation of patches scattered throughout the cytoplasm, without altering cell shape (control: fig. 5A [WKY] and fig. 5B [SHR]; cytochalasin D: fig. 5C [WKY] and fig. 5D [SHR]). As previously described,<sup>16</sup> pretreatment with cytochalasin D significantly decreased the AngII-induced intracellular  $\text{Ca}^{2+}$  transient in the SHR (amplitude:  $61 \pm 14\%$  of control value;  $P < 0.001$ ), whereas it was not altered in cells from WKY ( $105 \pm 8\%$ ;  $P = \text{NS}$ ). Pretreatment with cytochalasin D did not significantly alter the

effect of 2% isoflurane in both WKY ( $44 \pm 9\%$  of control;  $P < 0.01$ ) and SHR ( $56 \pm 8\%$  of control;  $P < 0.01$ ).

#### Effect of Isoflurane on Cytoskeleton Organization

We also tested the hypothesis that the effect of isoflurane on AngII-induced  $\text{Ca}^{2+}$  mobilization could be linked to an alteration by isoflurane itself of cytoskeletal network organization. To study this, immunofluorescent staining of  $\alpha$ -tubulin and actin were performed in VSMC

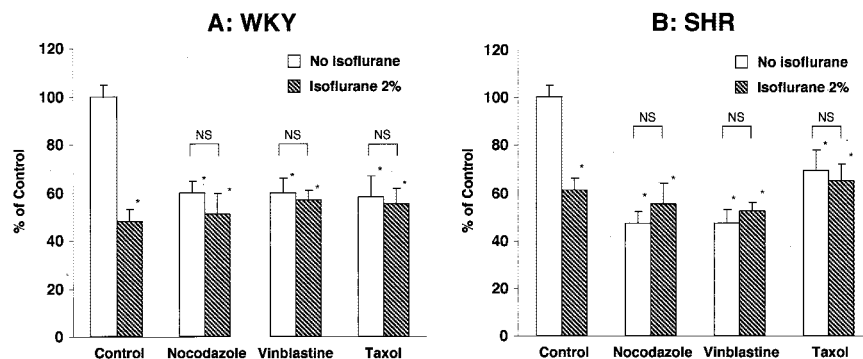

**Fig. 4.** Effect of nocodazole ( $5 \mu\text{M}$ , 30 min), vinblastine ( $10 \mu\text{M}$ , 30 min), or paclitaxel ( $8 \mu\text{M}$ , 30 min) on the amplitude of angiotensin II-induced  $\text{Ca}^{2+}$  mobilization in cells from Wistar Kyoto rats (WKY; A) and spontaneously hypertensive rats (SHR; B) in the presence or absence of 2% isoflurane. Results are expressed as percent of values obtained in control cells. \* $P < 0.05$ , treated versus control cells.

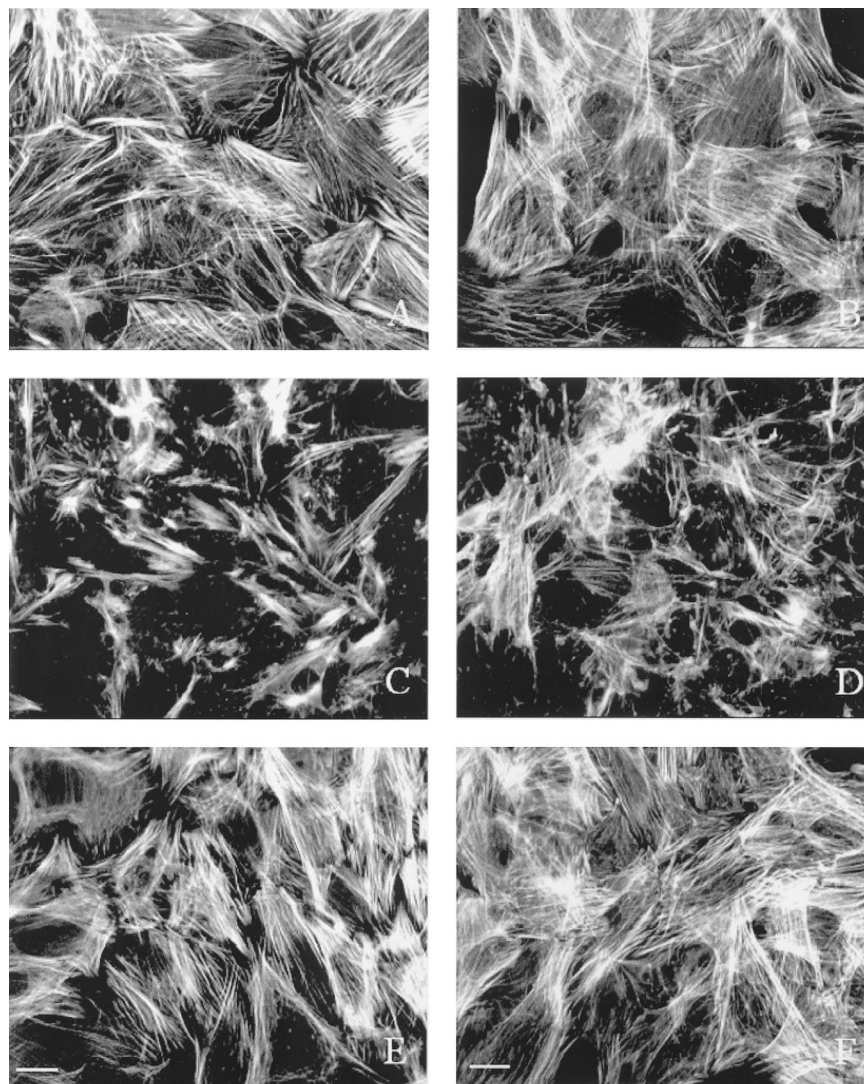

**Fig. 5.** Immunostaining of actin network, in cells from Wistar Kyoto rats (WKY; A–C) and spontaneously hypertensive rats (SHR; D–F). (A and D) Control cells; (B and E) cytochalasin D (2  $\mu$ M, 30 min), showing the alteration in actin organization; (C and F) exposure to 3% isoflurane (15 min), showing the lack of visible effect of isoflurane on actin network.

exposed to 1, 2, and 3% isoflurane for 15 min. In control conditions,  $\alpha$ -tubulin network was regular and homogeneous in both WKY (fig. 2A) and SHR (fig. 3A). Isoflurane altered in a dose-dependent manner the tubular organization with formation of  $\alpha$ -tubulin aggregates. This effect was observed at a concentration of 1% or greater in the WKY and 2% or greater in SHR (figs. 2 and 3). It is noteworthy that at 3% isoflurane, alteration in  $\alpha$ -tubulin networks were similar to that produced by nocodazole (5  $\mu$ M; figs. 2B and 3B). These alterations were reversible 60 min after anesthetic retrieval (figs. 2F and 3F).

In contrast, isoflurane did not alter actin network organization in both WKY (control: fig. 5A; 3% isoflurane: fig. 5E) and SHR (control: fig. 5B; 3% isoflurane: fig. 5F).

## Discussion

The current study demonstrated that clinically relevant concentrations of isoflurane decreased  $\text{Ca}^{2+}$  mobilization elicited by AngII in both normotensive and hyper-

tensive rat strains. Isoflurane reduced both AngII-induced  $\text{Ca}^{2+}$  mobilization from internal stores and  $\text{Ca}^{2+}$  influx through nifedipine-insensitive  $\text{Ca}^{2+}$  channels. The hypertensive strain was found more resistant to isoflurane than the normotensive one. This effect appeared to be strongly associated with a disorganization of the microtubular network by the anesthetic agent in both strains.

The effect of isoflurane on AngII-induced  $\text{Ca}^{2+}$  mobilization is consistent with the effect of isoflurane on  $\text{Ca}^{2+}$  mobilization elicited by other agonists known to stimulate phospholipase C, such as vasopressin.<sup>33</sup> An effect of isoflurane on  $\text{Ca}^{2+}$  stores *per se* is unlikely, as no significant increase in cell  $\text{Ca}^{2+}$  could be observed when cells were exposed to isoflurane alone. This is in accord with previous data reported by Akata *et al.*<sup>34</sup> This suggests that the inhibition by isoflurane of AngII-induced  $\text{Ca}^{2+}$  increase is related to an alteration in the dynamic of  $\text{Ca}^{2+}$  release elicited by AngII, rather than an effect on  $\text{Ca}^{2+}$  stores. This effect does not seem to be consequent to an interaction with the  $\text{AT}_1$  receptors or



AT<sub>1</sub>-related G<sub>q11</sub> protein, because isoflurane did not affect AngII-induced inositol 1,4,5-triphosphate synthesis or lipophosphatidate signaling.<sup>35,36</sup>

We therefore tested the hypothesis that isoflurane could affect the signaling pathway of AngII downstream of inositol 1,4,5-triphosphate synthesis. Our working hypothesis was that an interaction with microtubules network could be responsible of the inhibition of Ca<sup>2+</sup> release from internal stores. Previous studies have reported the role of microtubular network in the transduction of extracellular signal in various cell lines. In this regard, AngII-induced Ca<sup>2+</sup> mobilization in VSMC from both WKY and SHR strains was reported to require an intact microtubular network.<sup>16</sup> On the other hand, Allison *et al.*<sup>8</sup> have shown, using electron microscopy, that short-term exposure of cells to halogenated anesthetics could induce dispersal of the microtubule system and disaggregation of the microtubules.<sup>8</sup> This effect was concentration-dependent and reversible after withdrawal of the agent and was found to be associated with a direct effect on microtubule assembly.<sup>9</sup> More recently, an intact microtubular network was shown to be critical in the process of isoflurane-induced preconditioning in cardiomyocytes.<sup>37</sup> Our results showed that the effect of isoflurane on AngII-induced Ca<sup>2+</sup> release was abolished in cells pretreated with either nocodazole, vinblastine, or paclitaxel, agents known to alter the microtubular dynamics by different mechanisms. These results, taken together with the direct and reversible effect of isoflurane on microtubular assembly, strongly suggest that the effect of isoflurane on Ca<sup>2+</sup> release may be related to an interaction with microtubular network, at a level that remains to be determined. This implication of the microtubules in the signaling pathways linking AngII receptor to Ca<sup>2+</sup> release appears to be similar in both WKY and SHR. In contrast, isoflurane had no visible effect on actin network, and disorganizing the actin network alone did not affect the response to isoflurane in the WKY.

Agonist-stimulated release of intracellular Ca<sup>2+</sup> from the intracellular stores is accompanied by repletion of the store by Ca<sup>2+</sup> influx from the extracellular space.<sup>7</sup> It is now recognized that the action of AngII in VSMC involves both voltage-operating channels and voltage-independent channels.<sup>38</sup> The relative contribution of these two pathways to cell Ca<sup>2+</sup> increase depends on the VSMC type and experimental conditions.<sup>39</sup> The lack of effect of nifedipine in this study suggests that Ca<sup>2+</sup> influx is mediated by voltage-independent channels, in accordance with previous reports.<sup>6</sup> This is further supported by our observation that agonist-independent depletion of intracellular Ca<sup>2+</sup> stores with thapsigargin activates a Ca<sup>2+</sup> entry pathway. This pathway, termed "capacitative Ca<sup>2+</sup> entry," has been reported in different cell types, including VSMC, is insensitive to nifedipine, and contributes to smooth muscle tone.<sup>39-41</sup> The current results show that isoflurane inhibits both AngII- and

thapsigargin-induced Ca<sup>2+</sup> influx. This is in accord with studies showing that isoflurane inhibited the Ca<sup>2+</sup> influx elicited by vasopressin or platelet-derived growth factor in A7r5 aortic VSMC and by bradykinin in bovine aortic endothelial cells.<sup>33,42</sup> In contrast, Hirata *et al.*<sup>43</sup> have shown that isoflurane enhanced receptor-operated Ca<sup>2+</sup> influx in VSMC from rat thoracic aorta submaximally activated by phenylephrine. These discrepancies may be related to the diversity of influx pathways and the complexity of their regulation by signaling elements.

The increase in intracellular free Ca<sup>2+</sup> is the principal mechanism initiating contraction in VSMC. AngII induces a pharmacomechanical excitation-contraction coupling that occurs without changes of the membrane potential.<sup>44</sup> Several studies have suggested that microtubules can affect the contractile process in several cell types.<sup>10,27</sup> Despite this emerging evidence, the mechanisms of these observations have not been established, and the consequence of the alteration in response to AngII induced by isoflurane on VSMC contraction remains unknown. However, it may be linked to the role of AngII in short-term control of blood pressure during isoflurane anesthesia.<sup>4</sup>

Another main result of this study is the lower sensitivity of the SHR to isoflurane as compared with the WKY strain. This difference cannot be linked to an interspecies variation in anesthetic potency, because anesthetic requirement of isoflurane was shown to be similar in WKY and SHR.<sup>31</sup> In contrast, it could be related to the structural and functional abnormalities of the arterial wall and to the alteration in Ca<sup>2+</sup> handling observed in VSMC from SHR.<sup>18,20,23</sup> Intracellular Ca<sup>2+</sup> concentration and Ca<sup>2+</sup> storage pools in cultured aortic VSMC from SHR were found to be increased during nonstimulated conditions. The response to various agonists, including AngII, is also enhanced in the SHR, as shown in the current study and in that by Cortes *et al.*<sup>19</sup> In this regard, we observed an increase in the amplitude of intracellular Ca<sup>2+</sup> variation induced by AngII, suggesting an increase in Ca<sup>2+</sup> mobilization from internal stores in the SHR as compared with WKY, in accordance with previous studies.<sup>17</sup> Furthermore, regulation of AngII signaling pathways of the normotensive and hypertensive strains have been shown to differ in several respects, such as role of tyrosine kinase or mitogen-activated protein kinase, suggesting a signaling pattern characteristic of the hypertensive phenotype.<sup>5,16,45</sup> Whether this difference in sensitivity to isoflurane could be related to the greater instability of arterial blood pressure during isoflurane administration deserves further investigation. However, human hypertension differs in several points from hypertension of SHR, and our results cannot be directly extrapolated to humans with chronic hypertension.

Large conduit arteries do not contribute to peripheral vascular resistance, and the difference between the two strains we reported cannot be directly extrapolated to

the regulation of arterial blood pressure during isoflurane anesthesia. However,  $\text{Ca}^{2+}$  mobilization elicited by AngII was reported to differ only minimally between aortic and mesenteric vessels.<sup>23</sup> The model of aortic VSMC from SHR strain is of particular interest in hypertension, because the structural and functional changes of arterial wall have been linked to the alteration in arterial blood control and to detrimental consequences of hypertension. Furthermore, studying the effect of isoflurane on AngII-induced signaling pathways in this model could contribute to a better understanding of the molecular mechanisms implicated in the effect of anesthetics.

In conclusion, the current results established that isoflurane altered AngII-induced  $\text{Ca}^{2+}$  mobilization from internal stores and  $\text{Ca}^{2+}$  entry through capacitative  $\text{Ca}^{2+}$  channels in cultured rat aortic VSMC. The hypertensive rats were less sensitive to isoflurane than normotensive ones. This effect of isoflurane was associated to a disorganization of the microtubular network and implicated similar mechanisms in both normotensive and hypertensive strains. These results may prove useful in understanding the alteration in vascular reactivity observed during isoflurane anesthesia.

The authors thank the Soci  t   Fran  aise d'Anesth  sie et de R  animation, Paris, France.

## References

- Brendel JK, Johns RA: Isoflurane does not vasodilate rat thoracic aortic rings by endothelium-derived relaxing factor or other cyclic GMP-mediated mechanisms. *ANESTHESIOLOGY* 1992; 77:126-31
- Flynn NM, Buljubasic N, Bosnjak ZJ, Kampine JP: Isoflurane produces endothelium-independent relaxation in canine middle cerebral arteries. *ANESTHESIOLOGY* 1992; 76:461-7
- Ozhan M, Sill JC, Atagunduz P, Martin R, Katusic ZS: Volatile anesthetics and agonist-induced contractions in porcine coronary artery smooth muscle and  $\text{Ca}^{2+}$  mobilization in cultured immortalized vascular smooth muscle cells. *ANESTHESIOLOGY* 1994; 80:1102-13
- Ullman J: Vasopressin and angiotensin II in blood pressure control during isoflurane anesthesia in the rats. *Acta Anesth Scand* 1999; 43:860-5
- Berk BC, Corson MA: Angiotensin II signal transduction in vascular smooth muscle: Role of tyrosine kinases. *Circ Res* 1997; 80:607-16
- Orlov S, Resink TJ, Bernhardt J, Ferracin F, Buhler FR: Vascular smooth muscle cell calcium fluxes: Regulation by angiotensin II and lipoproteins. *Hypertension* 1993; 21:191-203
- Van Breemen C, Saida K: Cellular mechanisms regulating  $[\text{Ca}^{2+}]_i$  smooth muscle. *Annu Rev Physiol* 1989; 51:315-29
- Allison AC, Hulands GH, Nunn JF, Kitching JA, Macdonald AC: The effect of inhalational anaesthetics on the microtubular system in Actinosphaerium nucleolum. *J Cell Sci* 1970; 7:483-99
- Hinkley RE Jr: Microtubules induced by halothane: In vitro assembly. *J Cell Sci* 1978; 32:99-108
- Battistella-Patterson AS, Wang S, Wright GL: Effect of disruption of the cytoskeleton on smooth muscle contraction. *Can J Physiol Pharmacol* 1997; 75:1287-99
- Bourguignon LY, Iida N, Jin H: The involvement of the cytoskeleton in regulating  $\text{IP}_3$  receptor-mediated internal  $\text{Ca}^{2+}$  release in human blood platelets. *Cell Biol Int* 1993; 17:751-8
- Pedrosa-Ribeiro CM, Reece J, Putney JW Jr: Role of the cytoskeleton in calcium signaling in NIH 3T3 cells. *J Biol Chem* 1997; 272:26555-61
- Obara K, Nobe K, Nobe H, Kolodney MS, De Lanerolle P, Paul RJ: Effects of microtubules and microfilaments on  $[\text{Ca}^{2+}]_o$  and contractility in a reconstituted fibroblast fiber. *Am J Physiol* 2000; 279:C785-96
- Leiber D, Jasper JR, Alousi AA, Martin J, Bernstein D, Insel PA: Alteration in Gs-mediated signal transduction in S49 lymphoma cells treated with inhibitors of microtubules. *J Biol Chem* 1993; 268:3833-7
- Platts SH, Falcone JC, Holton WT, Hill MA, Meininger GA: Alteration of microtubule polymerization modulates arteriolar vasomotor tone. *Am J Physiol* 1999; 277:H100-6
- Samain E, Bouillier H, Perret C, Safar M, Dagher G: AngII-induced  $\text{Ca}^{2+}$  increase in smooth muscle cells from spontaneously hypertensive rat is regulated by actin and microtubule networks. *Am J Physiol* 1999; 277:H834-41
- Bendhack LM, Sharma RV, Bhalla RC: Altered signal transduction in vascular smooth muscle cells of spontaneously hypertensive rats. *Hypertension* 1992; 19(suppl II):II-142-8
- Cortes SF, Lemos VS, Corriu C, Stoclet J: Changes in angiotensin II receptor density and calcium handling during proliferation in SHR aortic myocytes. *Am J Physiol* 1996; 271:H2330-8
- Cortes SF, Lemos VS, Stoclet JC: Alterations in calcium stores in aortic myocytes from spontaneously hypertensive rats. *Hypertension* 1997; 29:1322-8
- Resink TJ, Scott-Burden T, Baur U, Burgin M, Buhler FR: Enhanced responsiveness to angiotensin II in vascular smooth muscle cells from spontaneously hypertensive is not associated with alterations in protein kinase C. *Hypertension* 1989; 14:293-303
- Samain E, Bouillier H, Miserey S, Perret C, Renaud J-F, Safar M, Dagher G: Extracellular signal-regulated kinase pathway is involved in basic fibroblast growth factor effect on angiotensin II-induced  $\text{Ca}^{2+}$  transient in vascular smooth muscle cell from Wistar-Kyoto and spontaneously hypertensive rats. *Hypertension* 2000; 35:61-7
- Sieffert W: Genetically fixed enhanced G protein activation in essential hypertension. *Kidney Blood Pres Res* 1996; 19:172-3
- Touyz RM, Tolloczko B, Schiffrin EL: Mesenteric vascular smooth muscle cells from spontaneously hypertensive rats display increased calcium responses to angiotensin II but not to endothelin-1. *J Hypertens* 1994; 12:663-73
- Goldman L, Caldera DL: Risks of general anesthesia and elective operation in the hypertensive patient. *ANESTHESIOLOGY* 1979; 50:285-92
- Prys-Roberts C: Anaesthesia and hypertension. *Br J Anaesth* 1984; 56:711-24
- Pacaud P, Malam-Souley R, Loirand G, Desgranges C: ATP raises  $[\text{Ca}^{2+}]_i$  via different P2-receptor subtypes in freshly isolated and cultured aortic myocytes. *Am J Physiol* 1995; 269:H30-6
- Chambers P, Neal DE, Gillespie JJ:  $\text{Ca}^{2+}$  signalling in cultured smooth muscle cells from human bladder. *Exp Physiol* 1996; 81:553-64
- Moore EDW, Becker PL, Fogarty KE, Williams DA, Fay FS:  $\text{Ca}^{2+}$  imaging in living cells: Theoretical and practical issues. *Cell Calcium* 1990; 11:157-79
- Williams DA, Fay FS: Intracellular calibration of the fluorescent calcium indicator Fura-2. *Cell Calcium* 1990; 11:75-83
- Aboulafia J, Oshiro ME, Feres T, Shimuta SI, Paiva AC: Angiotensin II desensitization and  $\text{Ca}^{2+}$  and  $\text{Na}^{+}$  fluxes in vascular smooth muscle cells. *Pfl  g Arch* 1989; 415:230-4
- Cole DJ, Marcantonio S, Drummond JC: Anesthetic requirement of isoflurane is reduced in spontaneously hypertensive and Wistar-Kyoto rats. *Lab Anim Sci* 1990; 40:506-9
- Sauviat MP, Frizelle HP, Descorps-Declercq A, Mazoit JX: Effects of halothane on the membrane potential in skeletal muscle of the frog. *Br J Pharmacol* 2000; 130:619-24
- Sill JC, Eskuri S, Nelson R, Tarara J, Van Dyke RA: The volatile anesthetic isoflurane attenuates  $\text{Ca}^{2+}$  mobilization in cultured vascular smooth muscle cells. *J Pharmacol Exp Ther* 1993; 265:74-80
- Akata T, Nakashima M, Izumi K: Comparison of volatile anesthetic actions on intracellular calcium stores of vascular smooth muscle. *ANESTHESIOLOGY* 2001; 94:840-50
- Nietgen GW, Honemann CW, Chan CK, Kamatchi GL, Durieux ME: Volatile anaesthetics have differential effects on recombinant m1 and m3 muscarinic acetylcholine receptor function. *Br J Anaesth* 1998; 81:569-77
- Chan CK, Durieux ME: Differential inhibition of lysophosphatidate signaling by volatile anesthetics. *ANESTHESIOLOGY* 1997; 86:660-9
- Ismaeil MS, Tkachenko I, Hickey RF, Cason BA: Colchicine inhibits isoflurane-induced preconditioning. *ANESTHESIOLOGY* 1999; 91:1816-22
- Somlyo AP, Somlyo AV: Signal transduction and regulation in smooth muscle. *Nature* 1994; 372:231-6
- Gibson A, McFadzean I, Wallace P, Wayman CP: Capacitative  $\text{Ca}^{2+}$  entry and the regulation of smooth muscle tone. *TIPS* 1998; 19:266-9
- Parekh AB, Penner R: Store depletion and calcium influx. *Physiol Rev* 1997; 77:901-30
- Xuan YT, Wang OL, Whorton AR: Thapsigargin stimulates  $\text{Ca}^{2+}$  entry in vascular smooth muscle cells: Nicardipine-sensitive and -insensitive pathways. *Am J Physiol* 1992; 262:C1258-65
- Simoneau C, Thuringer D, Cai S, Garneau L, Blaise G, Sauve R: Effects of halothane and isoflurane on bradykinin-evoked  $\text{Ca}^{2+}$  influx in bovine aortic endothelial cells. *ANESTHESIOLOGY* 1996; 85:366-79
- Hirata S, Enoki T, Kitamura R, Vinh VH, Nakamura K, Mori K: Effects of isoflurane on receptor-operated  $\text{Ca}^{2+}$  channels in rat aortic smooth muscle. *Br J Anaesth* 1998; 81:578-83
- Himpens B, Missiaen L, Casteels R:  $\text{Ca}^{2+}$  homeostasis in vascular smooth muscle. *J Vasc Res* 1995; 32:207-19
- Gros R, Benovic JL, Tan CM, Feldman RD: G-protein-coupled receptor kinase activity is increased in hypertension. *J Clin Invest* 1997; 99:2087-93
